# Supplementary material for: Porphyromonas gingivalis FimA Fimbriae: Fimbrial Assembly by fimA Alone in the fim Gene Cluster and Differential Antigenicity among fimA Genotypes
Source: PubMed Central journal article supplement (PMC3436787; doi:10.1371/journal.pone.0043722), 2012-09-07
Supplement: pone.0043722.s004.pdf [file pone.0043722.s004.pdf]

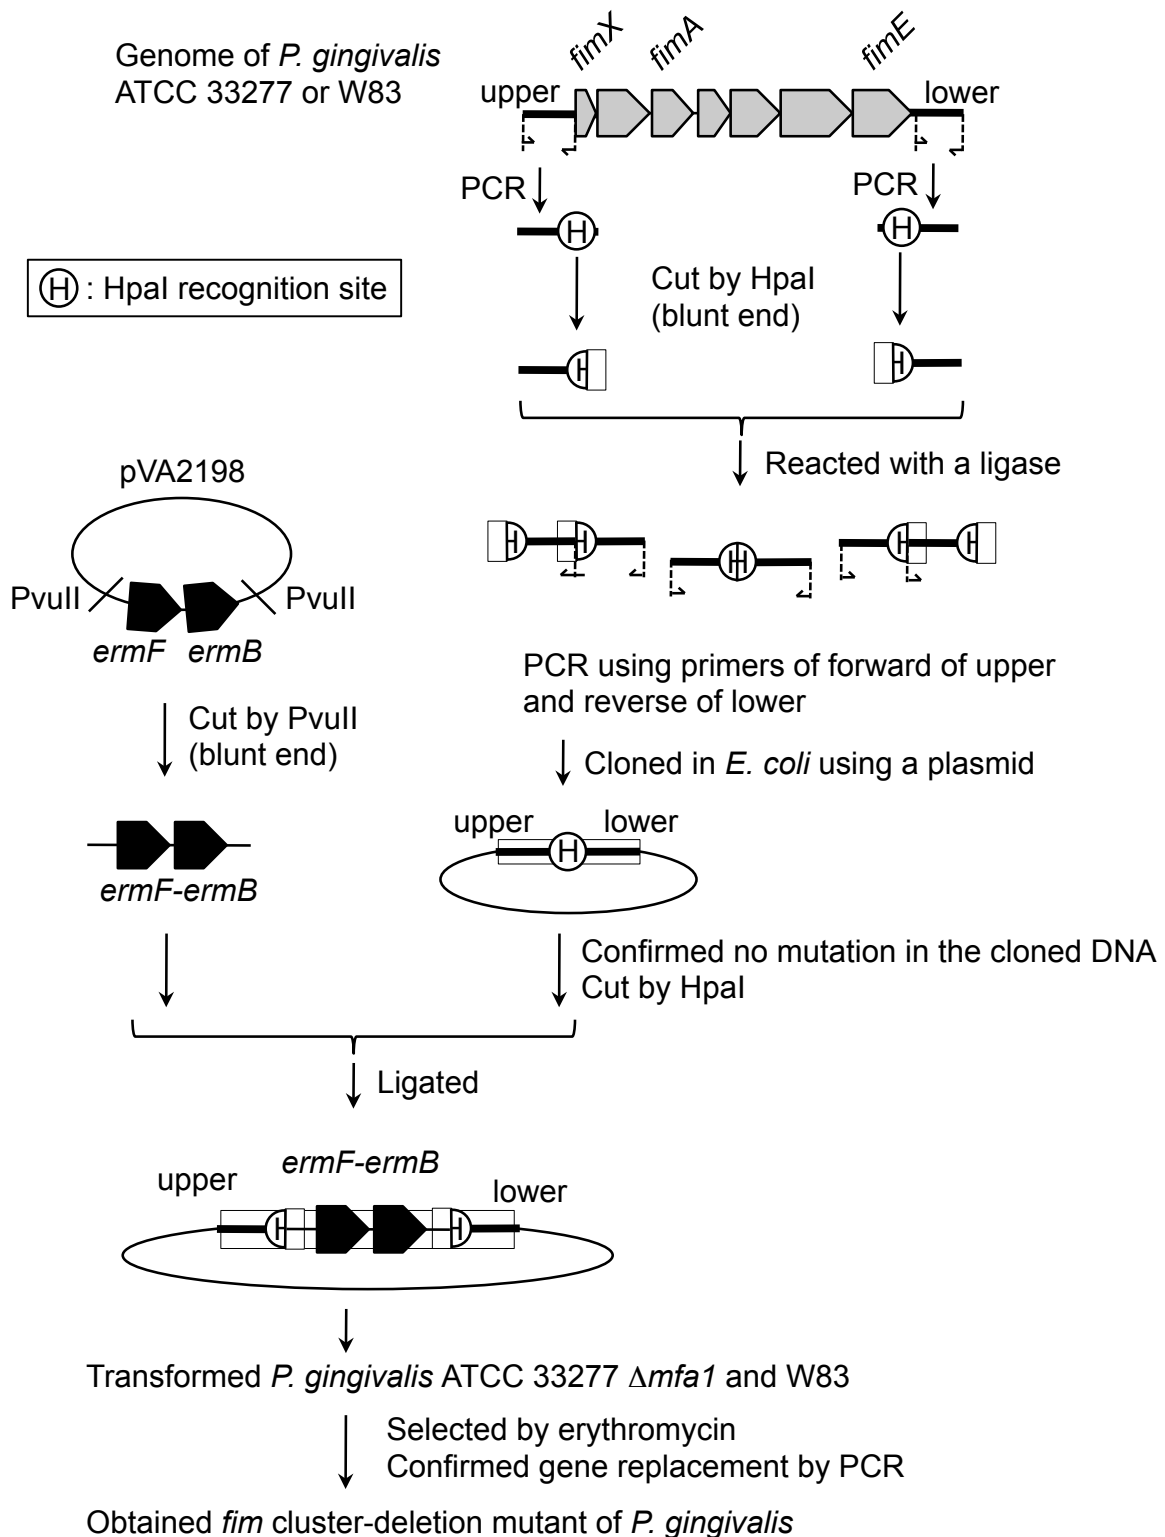

**Figure. S2 Construction of a *fim* cluster-deletion mutant of *P. gingivalis*.**

Small arrows show the primers. *ermF-ermB* confers erythromycin resistance to *P. gingivalis*. *ermB* was previously called *ermAM*, but the current nomenclature proposed to use *ermB* (Roberts et al., Antimicrob. Agents Chemother. 1999, 43: 2823-30), therefore we used here *ermB*.
