# Supplementary material for: Porphyromonas gingivalis FimA Fimbriae: Fimbrial Assembly by fimA Alone in the fim Gene Cluster and Differential Antigenicity among fimA Genotypes
Source: PubMed Central journal article supplement (PMC3436787; doi:10.1371/journal.pone.0043722), 2012-09-07
Supplement: pone.0043722.s005.pdf [file pone.0043722.s005.pdf]

Genome of  
*P. gingivalis* ATCC 33277

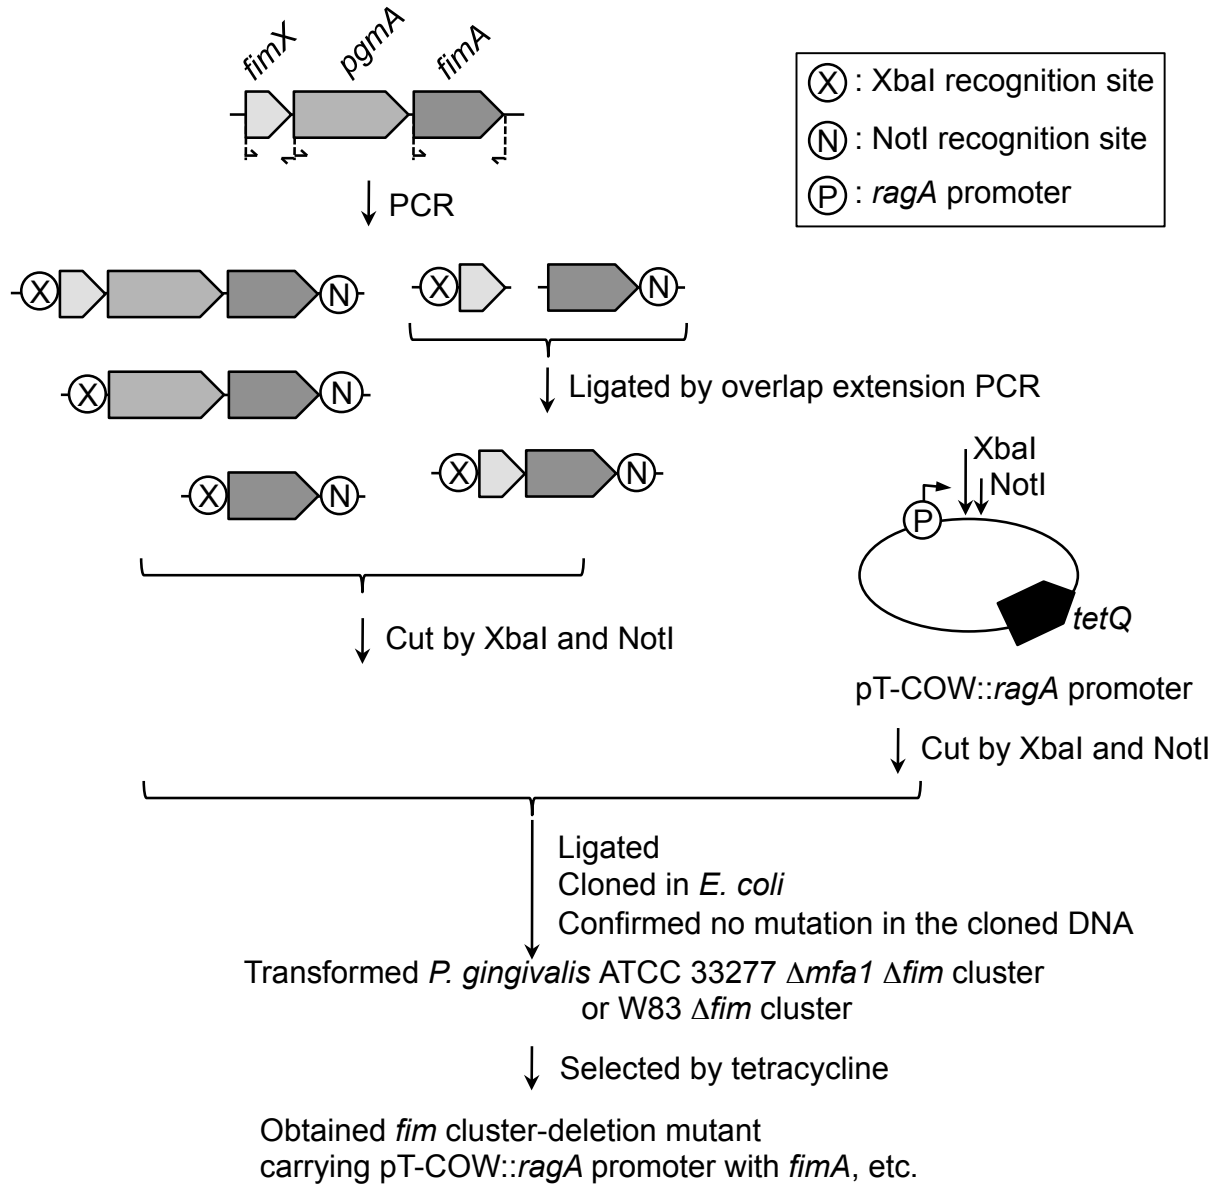

**Figure S3 Complementary introductions of *fim*-cluster genes into the *fim* cluster-deletion mutant of *P. gingivalis*.**

*fimX*-*pgmA*-*fimA*, *pgmA*-*fimA*, *fimX* & *fimA*, or *fimA* gene were introduced into *fim* cluster-deletion mutant of *P. gingivalis*. Small arrows show the primers. *tetQ* confers tetracycline resistance to *P. gingivalis*.
