# Supplementary material for: Porphyromonas gingivalis FimA Fimbriae: Fimbrial Assembly by fimA Alone in the fim Gene Cluster and Differential Antigenicity among fimA Genotypes
Source: PubMed Central journal article supplement (PMC3436787; doi:10.1371/journal.pone.0043722), 2012-09-07
Supplement: pone.0043722.s007.pdf [file pone.0043722.s007.pdf]

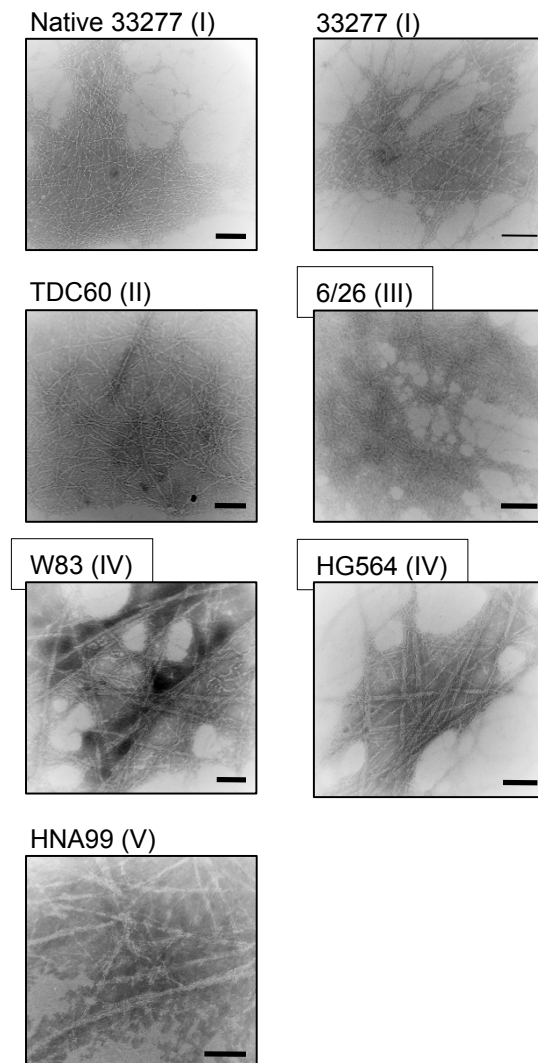

**Figure S5 Transmission electron microscopic observation of FimA fimbriae purified from complements.**

FimA fimbriae were purified from *P. gingivalis* ATCC 33277  $\Delta mfa1$  (Native 33277), and *P. gingivalis* ATCC 33277  $\Delta mfa1 \Delta fim$  cluster cells with *fimA* from 33277, TDC60, 6/26, W83, HG564 and HNA99 by using an expression vector. Samples were negatively stained with 1% ammonium molybdate. Some fimbriae appear to be bundled. Bars show 0.1  $\mu$ m.
