# Supplementary material for: Porphyromonas gingivalis FimA Fimbriae: Fimbrial Assembly by fimA Alone in the fim Gene Cluster and Differential Antigenicity among fimA Genotypes
Source: PubMed Central journal article supplement (PMC3436787; doi:10.1371/journal.pone.0043722), 2012-09-07
Supplement: pone.0043722.s010.pdf [file pone.0043722.s010.pdf]

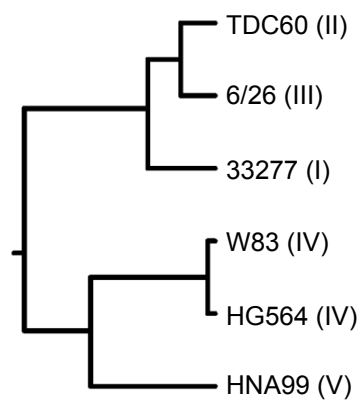

**Figure S8 Phylogenetic tree.**

Multiple sequence alignment between FimA fimbriae of *P. gingivalis* strains by ClustalW.
